# Supplementary material for: Germline mutations in Japanese familial pancreatic cancer patients
Source: PubMed Central journal article supplement (PMC5342048; doi:10.18632/oncotarget.12490), 2016-10-06
Supplement: oncotarget-07-74227-s001.pdf [file oncotarget-07-74227-s001.pdf]

## **Germline mutations in Japanese familial pancreatic cancer patients**

### **SUPPLEMENTARY TABLE**

**Supplementary Table S1: Rare non-synonymous variants in 21 genes associated with hereditary predisposition for pancreatic, breast and ovarian cancers**

See Supplementary File 1
